# Supplementary material
Source: PubMed Central journal article supplement (PMC2871444)

## Supplementary Figure

**Fig. S1**

Wild type and mutated form of Tgl4p-His<sub>6</sub> fusion protein ((TGL4-T675A, S890A) were constructed and overexpressed in *P. pastoris*. The overexpressed protein was isolated using affinity column purification as described (41). Protein fractions were analyzed by SDS-PAGE and Western blotting using anti-His<sub>6</sub> monoclonal antibody as described in “Materials and Methods” section.

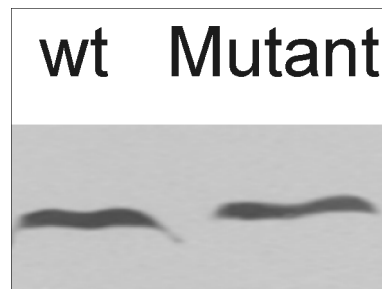

Supplement: supp_M109.076331_SoRa4_JBC_Fig._S1.pdf [file supp_M109.076331_SoRa4_JBC_Fig._S1.pdf]
